# Supplementary material
Source: publisher figshare collection journal article supplement (https://brill.figshare.com/articles/dataset/_/24647916)
Supplement: Supplementary file 1 [file 2]

## Sheet: Лист1
Table A1. Wood anatomical traits for the plant species occurred in fynbos vegetation
		GR	Porosity	Lv	Perf	Dv	Ns	Ngr	HT	FT	VT	M	Reference
Rosaceae	Cliffortia ruscifolia	0	0	462	0	44	83		0	100	0	244.916	Kotina et al. (2017)
	Cliffortia strobilifera	0	0	282	0	33	104		0	100	0	89.4808	Kotina et al. (2017)
Stilbaceae	Campylostachys cernua	100	0	395	0	21	639		0	0	100	12.9812	Carlquist (1986)
	Eurylobium serrulatum	100	0	439	0	38.8	119		0	0	0	143.136	Carlquist (1986)
	Euthystachys abbreviata	50	0	495	0	22.2	403		0	0	0	27.268	Carlquist (1986)
	Stilbe albiflora	0	0	372	50	14.8	199		0	0	0	27.6663	Carlquist (1986)
	Stilbe ericoides	0	0	382	50	24.8	474		0	0	100	19.9865	Carlquist (1986)
	Stilbe mucronata	100	0	543	0	31	312		0	0	0	53.9519	Carlquist (1986)
	Stilbe phylicoides	0	0	420	0	27.1	632		0	0	0	18.0095	Carlquist (1986)
	Stilbe rupestris	0	0	374	0	24.8	467		0	0	0	19.8612	Carlquist (1986)
	Stilbe vestita	50	0	491	0	25.7	306		0	0	0	41.2376	Carlquist (1986)
	Xeroplana zeyheri	50	0	370	0	22.2	653		0	0	100	12.5789	Carlquist (1986)
	Retzia capensis	0	0	431	50	32.4	146	1.46	0	0	0	95.6466	Carlquist (1986)
Penaeaceae	Brachysiphon acutus	0	0	332	0	22	340	1.08	0	100	0	21.4824	Carlquist & DeBuhr (1977)
	Brachysiphon fucatus	0	0	565	0	33	168	1.12	0	100	0	110.982	Carlquist & DeBuhr (1977)
	Brachysiphon rupestris	0	0	427	0	23	336	1.16	0	100	0	29.2292	Carlquist & DeBuhr (1977)
	Endonema lateriflora	0	0	526	0	30	104	1.24	0	100	0	151.731	Carlquist & DeBuhr (1977)
	Endonema retzioides	0	0	444	0	42	92	1.12	0	100	0	202.696	Carlquist & DeBuhr (1977)
	Penaea acutifolia	0	0	597	0	46	175	1.12	0	100	0	156.926	Carlquist & DeBuhr (1977)
	Penaea cneorum	0	0	597	0	42	116	1.11	0	100	0	216.155	Carlquist & DeBuhr (1977)
	Penaea mucronata	0	0	458	0	44	146	1.12	0	100	0	138.027	Carlquist & DeBuhr (1977)
	Saltera sarcocolla	0	0	733	0	35	104	1.12	0	100	0	246.683	Carlquist & DeBuhr (1977)
	Sonderothamnus petraeus	0	0	456	0	23	231	1.32	0	100	0	45.4026	Carlquist & DeBuhr (1977)
	Stylapterus ericoides	0	0	781	0	31	199	1.16	0	100	0	121.663	Carlquist & DeBuhr (1977)
	Stylapterus fruticulosus	0	0	515	0	27	220	1.04	0	100	0	63.2045	Carlquist & DeBuhr (1977)
Fabaceae (tribe Podalyrieae)	Calpurnia intrusa	100	0	151	0	41	44	1.8	0	0	100	140.705	Stepanova et al. (2013)
	Cyclopia aurescens	100	0	228	0	8	792	160.5	100	0	100	2.30303	Stepanova et al. (2013)
	Cyclopia burtonii	100	0	172	0	13	658	138.2	100	0	100	3.39818	Stepanova et al. (2013)
	Cyclopia buxifolia	100	0	227	0	19	228	81.2	100	0	100	18.9167	Stepanova et al. (2013)
	Cyclopia genistoides	50	0	284	0	14	415	21.9	100	0	100	9.58072	Stepanova et al. (2013)
	Cyclopia intermedia	50	0	226	0	15	447	81.8	100	0	100	7.58389	Stepanova et al. (2013)
	Cyclopia maculata (Andrew)	0	0	187	0	25	195	33.1	100	0	100	23.9744	Stepanova et al. (2013)
	Cyclopia plicata	100	0	161	0	7	1615		100	0	100	0.697833	Stepanova et al. (2013)
	Cyclopia subternata	0	0	249	0	23	470	102.4	100	0	100	12.1851	Stepanova et al. (2013)
	Liparia hirsuta	100	0	217	0	19	280	5.4	100	0	100	14.725	Stepanova et al. (2013)
	Liparia myrtifolia	50	0	191	0	22	545	15.7	100	0	100	7.71009	Stepanova et al. (2013)
	Liparia racemosa	100	0	224	0	25	358	18.9	100	0	100	15.6425	Stepanova et al. (2013)
	Liparia splendens	0	0	198	0	16	433	8	0	0	100	7.3164	Stepanova et al. (2013)
	Podalyria calyptrata	0	0	216	0	47			100	0	100		Stepanova et al. (2013)
	Podalyria lanceolata	100	0	271	0	26	199	11.7	100	0	100	35.407	Stepanova et al. (2013)
	Podalyria myrtifolia	100	0	161	0	21		3	100	0	100		Stepanova et al. (2013)
	Podalyria rotundifolia	0	0	189	0	25	40	3.9	100	0	100	118.125	Stepanova et al. (2013)
	Stirtonanthus insignis	100	0	169	0	18	159	4.5	100	0	100	19.1321	Stepanova et al. (2013)
	Stirtonanthus taylorianus	100	0	350	0	16	317	17.7	100	0	100	17.6656	Stepanova et al. (2013)
	Amphithalea ericifolia	0	0	176	0	14	294	2.3	100	0	100	8.38095	Stepanova et al. (2013)
	Amphithalea rostrata	100	0	175	0	10	295	3	0	0	100	5.9322	Stepanova et al. (2013)
	Amphitalea vlokii	100	0	135	0	13	104	2.8	100	0	100	16.875	Stepanova et al. (2013)
	Xiphotheca canescens	100	0	193	0	16	281	15.9	100	0	100	10.9893	Stepanova et al. (2013)
	Xiphotheca elliptica	100	0	205	0	17	134	14.6	100	0	100	26.0075	Stepanova et al. (2013)
	Xiphotheca phylicoides	100	0	160	0	13	275	16.1	100	0	100	7.56364	Stepanova et al. (2013)
	Xiphotheca tecta	0	0	158	0	18	415	16.4	100	0	100	6.85301	Stepanova et al. (2013)
Fabaceae (tribe Crotalarieae)	Aspalathus excelsa	0	0	260	0	24	83	2.5	0	0	0	75.1807	Oskolski et al. (2014)
	Aspalathus linearis	50	0	128	0	22	219.9	7.6	0	0	0	12.8058	Oskolski et al. (2014)
	Aspalathus nivea	100	0	284	0	35	60	3	0	0	0	165.667	Oskolski et al. (2014)
	Aspalathus nigra	100	0	125	0	11	266	4.3	0	0	0	5.16917	Oskolski et al. (2014)
	Aspalathus vulnerans	0	0	140	0	24	122	3.1	0	0	0	27.541	Oskolski et al. (2014)
	Rafnia amplexicaulis KK 55-11	50	50	147	0	47	62	2.6	0	0	0	111.435	Oskolski et al. (2014)
	Rafnia angulata KK 59-11	0	0	174	0	51	59.5	2.5	0	0	0	149.143	Oskolski et al. (2014)
	Wiborgia monaptera JSB 152	100	50	100	0	25	119.9	3.4	0	0	0	20.8507	Oskolski et al. (2014)
	Wiborgia obcordatum KK 52-11	100	50	123	0	34	62.8	1.9	0	0	0	66.5924	Oskolski et al. (2014)
Apiaceae	Centella difformis	50	0	273	50	21	440	1.6	0	0	0	13.0295	Oskolski et al. (2010)
	Centella rupestris	0	0	363	50	13	540	2.7	0	0	0	8.73889	Oskolski et al. (2010)
	Centella triloba		0	263	50	17	425	2	0	0	0	10.52	Oskolski et al. (2010)
	Centella villosa	50	0	230	50	18	429	1.5	0	0	0	9.65035	Oskolski et al. (2010)
	Centella virgata	0	0	247	50	29	357	1.4	0	0	0	20.0644	Oskolski et al. (2010)
Geissolomataceae	Geissoloma marginatum	0	0	902	100	39.8	26	1.3	0	100	0	1380.75	Carlquist (1975)
Grubbiaceae	Grubbia rosmarinifolia	100	0	1187	100	37.8	206	1.14	0	100	0	217.809	Carlquist (1977a)
	Grubbia rourkei	50	0	1267	100	39.9	246	1.14	0	100	0	205.501	Carlquist (1977a)
	Grubbia tomentosa	50	0	1014	100	43.2	139	1.1	0	100	0	315.142	Carlquist (1977a)
Geraniaceae	Pelargonium abrotanifolium	50	0	145	0	24	326		0	0	0	10.6748	Van der Wal et al. (1987)
	Pelargonium glutinosum	0	50	144	0	31	122		0	0	0	36.5902	Van der Wal et al. (1987)
	Pelargonium citronellum	0	0	305	0	33	71		0	0	0	141.761	Van der Wal et al. (1987)
	Pelargonium scabrum	100	50	267	0	34	92		0	0	0	98.6739	Van der Wal et al. (1987)
	Pelargonium hispidum	50	50	283	0	46	69		0	0	0	188.667	Van der Wal et al. (1987)
	Pelargonium grandiflorum	50	50	218	0	38	82		0	0	0	101.024	Van der Wal et al. (1987)
	Pelargonium greytonense	50	0	248	0	33	107		0	0	0	76.486	Van der Wal et al. (1987)
	Pelargonium zonale	100	50	247	0	37	97		0	0	0	94.2165	Van der Wal et al. (1987)
	Pelargonium cucullatum	50	50	321	0	43	70		0	0	0	197.186	Van der Wal et al. (1987)
	Pelargonium graveolens	0	0	334	0	40	94		0	0	0	142.128	Van der Wal et al. (1987)
	Pelargonium papilionaceum	50	50	377	0	50	54		0	0	0	349.074	Van der Wal et al. (1987)
	Pelargonium vitifolium	50	0	385	0	54	48		0	0	0	433.125	Van der Wal et al. (1987)
Bruniaceae	Audouinia capitata Brongn.	0	0	594	100	23	137	1.16	0	100	0	99.7226	Carlquist (1978)
	Berzelia abrotanoides Brongn.	100	0	889	100	30	263	1.36	0	100	0	101.407	Carlquist (1978)
	Berzelia bruchelli Dummer	50	0	1071	100	24	350	1.24	0	100	0	73.44	Carlquist (1978)
	Berzelia commutata Sond.		0	706	100	46	179	1.2	0	100	0	181.43	Carlquist (1978)
	Berzelia cordifolia Schlecht.	100	0	693	100	28	337	1.2	0	100	0	57.5786	Carlquist (1978)
	Berzelia ecklonii Pillans	100	0	900	100	33	120	1.36	0	100	0	247.5	Carlquist (1978)
	Berzelia galpinii Pillans	50	0	863	100	31	265	1.36	0	100	0	100.955	Carlquist (1978)
	Berzelia intermedia Schlecht.	50	0	821	100	29	276	1.12	0	100	0	86.2645	Carlquist (1978)
	Berzelia lanuginosa Brongn.	0	0	866	100	43	119	1.12	0	100	0	312.924	Carlquist (1978)
	Berzelia rubra Schlecht.	0	0	843	100	26	158	1.5	0	100	0	138.722	Carlquist (1978)
	Berzelia squarrosa Sand.	50	50	737	100	27	338	1.16	0	100	0	58.8728	Carlquist (1978)
	Brunia albiflora Phillips	100	0	852	100	32	155	1.12	0	100	0	175.897	Carlquist (1978)
	Brunia alopecuroides Thunb.	100	0	971	100	23	488	1.28	0	100	0	45.7643	Carlquist (1978)
	Brunia laevis Thunb.	0	0	477	100	29	218	1.16	0	100	0	63.4541	Carlquist (1978)
	Brunia nodiflora Linn.	0	0	768	100	28	240	1.16	0	100	0	89.6	Carlquist (1978)
	Brunia stokoei Phillips	100	0	739	100	32	106	1.08	0	100	0	223.094	Carlquist (1978)
	Linconia alopecuroidea Linn.	50	0	826	100	24	218	1.12	0	100	0	90.9358	Carlquist (1978)
	Linconia cuspidata Swartz	0	0	546	100	20	182	1.16	0	100	0	60	Carlquist (1978)
	Lonchostoma esterhuyseniae Strid	100	0	734	100	29	218	1.16	100	100	0	97.6422	Carlquist (1978)
	Lonchostoma monogyna ( Vahl) Pillans	100	0	851	100	25	283	1.32	0	100	0	75.1767	Carlquist (1978)
	Lonchostoma myrtoides (Vahl) Pillans	100	0	532	100	33	79	1.28	0	100	0	222.228	Carlquist (1978)
	Lonchostoma pentandrum (Thunb.) Pillans	100	0	732	100	24	227	1.2	0	100	0	77.3921	Carlquist (1978)
	Lonchostoma purpureum Pillans	100	0	659	100	31	287	1.28	100	100	0	71.1812	Carlquist (1978)
	Mniothamnea bullata Schlecht	50	0	778	100	28	158	1.12	0	100	0	137.873	Carlquist (1978)
	Mniothamnea callunoides Niedenzu	100	0	799	100	22	382	1.12	0	100	0	46.0157	Carlquist (1978)
	Nebelia fragarioides 0. Kuntze	50	0	674	100	25	527	1.4	0	100	0	31.9734	Carlquist (1978)
	N ebelia paleaceae Sweet	0	0	613	100	27	180	1.2	0	100	0	91.95	Carlquist (1978)
	N ebelia sphaerocephala O.Kuntze	100	0	760	100	23	432	1.2	0	100	0	40.463	Carlquist (1978)
	Nebelia stokoei Pillans	100	50	594	100	26	308	1.16	0	100	0	50.1429	Carlquist (1978)
	Pseudobaeckea africana (Bunn. f.)Pillans	0	0	1011	100	33	193	1.2	0	100	0	172.865	Carlquist (1978)
	Pseudobaeckea cordata Niedenzu	100	50	895	100	39	177	1.16	0	100	0	197.203	Carlquist (1978)
	Raspalia globosa (Lam.) Pillans	100	0	914	100	26	307	1.16	0	100	0	77.4072	Carlquist (1978)
	Raspalia microphylla Brongn	50	0	982	100	26	189	1.12	0	100	0	135.09	Carlquist (1978)
	Raspalia stokoei Pillans	100	0	608	100	23	245	1.12	0	100	0	57.0776	Carlquist (1978)
	Raspalia variabilis Pillans	100	0	643	100	27	287	1.12	0	100	0	60.4913	Carlquist (1978)
	Raspalia virgata ( Brongn. )	100	0	838	100	28	327	1.2	0	100	0	71.7554	Carlquist (1978)
	Staavia capitella Sond.	0	0	830	100	22	361	1.16	0	100	0	50.5817	Carlquist (1978)
	Staavia glutinosa Dahl	0	0	986	100	30	358	1.32	0	100	0	82.6257	Carlquist (1978)
	Staavia pinifolia Willd.	0	0	548	100	29	450	1.32	0	100	0	35.3156	Carlquist (1978)
	Staavia radiata Dahl	0	0	773	100	20	356	1.4	0	100	0	43.427	Carlquist (1978)
	Thamnea diosmoides Oliver	50	50	597	100	22	315	1.24	0	100	0	41.6952	Carlquist (1978)
	Thamnea massoniana Di.immer	50	0	380	100	27	150	1.08	0	100	0	68.4	Carlquist (1978)
	Tittmannia esterhuyseniae	100	0	452	100	26	200	1.12	0	100	0	58.76	Carlquist (1978)
	Tittmannia laevis Pillans	0	0	475	100	26	127	1.04	0	100	0	97.2441	Carlquist (1978)
	Tittmannia laxa Presl	0	0	570	100	25	194	1.04	0	100	0	73.4536	Carlquist (1978)
Roridulaceae	Roridula dentata L.	100	50	759	100	41	129	1.1	0	100	0	241.2	Carlquist (1976)
	Roridula gorgonias Planch.	0	0	978	100	39	83	1.1	0	100	0	459.5	Carlquist (1976)
Rutaceae	Acmadenia alternifolia	100	0	205	0	24	95	2.07	0	0	0	51.8	Akinlabi et al. (2022)
	Adenandra maginata	100	50	248	0	20	22	3.44	0	0	0	225.4	Akinlabi et al. (2022)
	Adenanadra rotundifolia	100	0	166	0	33	22	3.41	0	0	0	249	Akinlabi et al. (2022)
	Adenandra uniflora	0	0	316	0	15	24	1.67	0	0	0	197.5	Akinlabi et al. (2022)
	Agathosma betulina	100	0	312	0	27	17	2.84	0	0	0	48.38	Akinlabi et al. (2022)
	Agathosma ciliaris	100	0	207	0	19	16	1.52	0	0	0	25.61	Akinlabi et al. (2022)
	Agathosma crenulata	0	0	266	0	25	14	2.55	0	0	0	49.82	Akinlabi et al. (2022)
	Agathosma serpyllacea	100	0	202	0	21	16	2.29	0	0	0	27.76	Akinlabi et al. (2022)
	Coleonema alba	100	0	227	0	20	14	1.7	0	0	0	33.46	Akinlabi et al. (2022)
	Diosma hirsuta	100	0	250	0	25	14	2.6	0	0	0	44.17	Akinlabi et al. (2022)
	Diosma meyeriana	100	0	298	0	28	14	2.24	0	0	0	60.24	Akinlabi et al. (2022)
	Diosma oppositifolia	100	0	192	0	29	10	1.72	0	0	0	58.83	Akinlabi et al. (2022)
	Empleurum unicapsulare	0	0	286	0	37	80	2.1	0	0	0	132.27	Akinlabi et al. (2022)
	Euchaetis glomerata	100	0	135	0	23	131	2.6	0	0	0	23.7	Akinlabi et al. (2022)
	Macrostylis crassifolia	100	0	216	0	30	12	1.78	0	0	0	540	Akinlabi et al. (2022)
Proteceae	Protea glabra	100	0	322.28	0	39.6	19.07	1.04	0	100	0	669.234	Stepanova et al. (2021)
	Protea compacta	100	0	500.66	0	46.34	56.13	1.07	0	100	0	413.337	Stepanova et al. (2021)
	Protea cynaroides	100	0	400.98	0	47.65	28.73	1.08	0	100	0	665.043	Stepanova et al. (2021)
	Protea eximia	0	0	327.97	0	25.12	70.67	1.23	0	100	0	116.579	Stepanova et al. (2021)
	Protea lanceolata	0	0	379.04	0	32.98	42.8	1.04	0	100	0	292.073	Stepanova et al. (2021)
	Protea laurifolia	0	0	354.34	0	55.96	29.6	1.12	0	100	0	669.894	Stepanova et al. (2021)
	Protea longifolia	100	0	338.48	0	31.14	130	1.21	0	100	0	81.079	Stepanova et al. (2021)
	Protea mundii	0	0	475.35	0	52.27	81.6	1.24	0	100	0	304.492	Stepanova et al. (2021)
	Protea neriifolia	100	0	356.45	0	47.87	62.93	1.12	0	100	0	271.147	Stepanova et al. (2021)
	Protea nitida	100	0	278.23	0	91.79	11.6	1.06	0	100	0	2201.61	Stepanova et al. (2021)
	Protea repens	0	0	371.21	0	42.83	51.87	1.42	0	100	0	306.515	Stepanova et al. (2021)
	Protea scabra	100	0	271.3	0	59.01	41.1	1.05	0	0	0	389.523	Stepanova et al. (2021)
	Leucadendron argenteum	0	0	307.41	0	59.87	26.34	2.01	0	0	0	698.733	Stepanova et al. (2021)
	Leucadendron laxum	0	0	344.17	0	24.94	151.33	1.61	0	100	0	56.7211	Stepanova et al. (2021)
	Leucadendron tinctum	100	0	331.32	0	38.02	47.73	1.44	0	100	100	263.918	Stepanova et al. (2021)
	Leucadendron salignum	0	0	298.22	0	37.4	83.13	1.41	0	100	0	134.169	Stepanova et al. (2021)
	Leucadendron laureolum	0	0	245.68	0	31.53	70.67	1.56	0	100	0	109.612	Stepanova et al. (2021)
	Leucadendron xanthoconus	100	0	191.85	0	31.85	42.13	1.27	0	100	0	145.037	Stepanova et al. (2021)
	Leucadendron pubescens	100	0	305.63	0	26.62	84.99	1.52	0	100	0	95.7274	Stepanova et al. (2021)
	Leucadendron brunioides	0	0	281.75	0	17.65	62.5	2.05	0	100	0	79.5662	Stepanova et al. (2021)
	Leucadendron corymbosum	0	0	380.4	0	41.5	34.3	1.64	0	100	0	460.251	Stepanova et al. (2021)
	Paranomus reflexus	50	0	408.89	0	37.96	90.67	1.71	0	0	0	171.186	Stepanova et al. (2021)
	Paranomus bracteolaris	50	0	370.61	0	35.1	75.1	1.42	0	0	0	173.215	Stepanova et al. (2021)
	Serruria aemula	0	0	292.29	0	31.79	104.53	1.39	0	100	100	88.8922	Stepanova et al. (2021)
	Serruria fucifolia	0	0	320.04	0	28.23	77.7	1.37	0	100	100	116.277	Stepanova et al. (2021)
	Serruria phyllicoides	100	0	306.1	0	29.8	97.3	1.67	0	0	100	93.749	Stepanova et al. (2021)
	Serruria sp.	0	0	252.3	0	34.7	71.6	1.63	0	100	100	122.274	Stepanova et al. (2021)
	Serruria rostellaris	0	0	193.1	0	24.3	46.9	1.13	0	100	100	100.05	Stepanova et al. (2021)
	Serruria fasciflora	50	0	354	0	24.7	124.1	1.27	0	100	100	70.4577	Stepanova et al. (2021)
	Serruria elongata	100	0	386.1	0	42.3	33.8	1.29	0	100	100	483.196	Stepanova et al. (2021)
	Leucospermum bolusi	0	0	260.6	0	64.7	28.9	1.67	0	100	0	583.419	Stepanova et al. (2021)
	Leucospermum rodolentum	0	0	338.5	0	45.8	70.6	2.29	0	100	0	219.593	Stepanova et al. (2021)
	Leucospermum praecox	0	0	433.6	0	35,03	72.93	1.58	0	100	0	5.94543	Stepanova et al. (2021)
	Leucospermum muirii	0	0	251.55	0	62.35	24.93	1.26	0	100	0	629.127	Stepanova et al. (2021)
	Leucospermum conocarpodendron	100	0	360.05	0	57.99	20.13	1.31	0	100	0	1037.22	Stepanova et al. (2021)
	Leucospermum cordifolium	0	0	317.15	0	48.08	37.4	1.32	0	100	0	407.716	Stepanova et al. (2021)
	Leucospermum truncatulum	0	0	350.28	0	47.15	40.8	1.28	0	100	0	404.797	Stepanova et al. (2021)
	Leucospermum calligerum	0	0	302.85	0	43.99	39.34	1.4	0	100	0	338.647	Stepanova et al. (2021)
	Mimetes cucullatus	0	0	432.26	0	48.18	17.4	1.07	0	100	0	1196.91	Stepanova et al. (2021)
	Mimetes fimbriifolius	0	0	356.13	0	59.95	18.8	1.12	0	100	0	1135.64	Stepanova et al. (2021)
	Aulax umbellata	100	0	344.54	0	38.97	68.34	1.65	0	100	0	196.469	Stepanova et al. (2021)
	Diastella divaricata Rourke	0	0	330.1	0	57.2	66.9	1.86	0	100	0	282.238	Stepanova et al. (2021)
	Spatalla barbigera	50	0	389.7	0	66.7	90.1	1.16	0	0	0	288.49	Stepanova et al. (2021)
	Spatalla curvifolia	100	0	405.6	0	31.6	94.6	1.22	0	100	0	135.486	Stepanova et al. (2021)
	Vexatorella amoena	50	0	255.46	0	18.8	48	1.43	0	0	0	100.055	Stepanova et al. (2021)
Thymelaeaceae	Gnidia galpinii	0	0	171	0	24.65	61	2.31	0	0	0	69.1008
	Gnidia gemimiflora	100	50	227	0	21.35	59	1.45	100	0	0	82.1432
	Gnidia pinifolia	100	50	223.25	0	27.4275	66	2.49	0	0	0	92.7756
	Thymelina squarrosa	100	50	163.5	0	17.855	76	3.9	0	0	0	38.4117
	Lachnaea densiflora	50	0	277	0	26.5	126	2.05	0	0	0	58.2579
	Lachnaea diosmoides	100	50	302	0	28	142	1.8	0	0	0	59.5493
	Passerina corymbosa	100	0	232	0	32.93	74	3.55	100	0	0	103.24
	Passerina montana	100	0	215	0	30	149	4.4	100	0	0	43.2886
	Passerina rigida	50	0	256.5	0	27.45	74.5	1.9	100	0	100	94.5091
	Passerina vulgaris	50	0	220	0	28.75	52	5.12	100	0	0	121.635
	Struthiola ciliata	50	50	215	0	27.73	58	2.01	0	0	0	102.792
	Struthiola confusa	50	0	257	0	17.17	72.5	2.97	100	0	0	60.8647
	Struthiola dodecardia	100	0	213.5	0	24.52	67.5	5.1	0	0	0	77.5559
	Struthiola lineariloba	100	0	248	0	23.26	65	3.86	100	0	0	88.7458
	Struthiola myrsinties	100	0	232	0	23.59	60	3.91	0	0	0	91.2147
	Struthiola tomentosa	50	0	232	0	22.58	74	4.01	0	0	0	70.7914
Ericaceae	Erica arachnocalyx	100	0	169	0	13.88	82	1.02	0	0	0	28.6063	Akinlabi et al. (in press)
	Erica bruniades	100	0	202	0	20.99	61	1.03	0	0	0	69.5079	Akinlabi et al. (in press)
	Erica caffra	100	0	305	0	42.35	22	1.09	0	0	0	587.125	Akinlabi et al. (in press)
	Erica coccinea	100	0	226	0	23	36	1.02	0	0	0	214.1	Akinlabi et al. (in press)
	Erica corifolia	100	0	239	0	16.18	46	1.02	0	0	0	84.0657	Akinlabi et al. (in press)
	Erica cristiflora	100	0	222	0	19.39	72	1.01	0	0	0	59.7858	Akinlabi et al. (in press)
	Erica daphniflora	100	0	156	0	19.72	45	1.02	0	0	0	68.3627	Akinlabi et al. (in press)
	Erica discolor	100	0	172	0	16.71	71	1.01	0	0	0	40.4806	Akinlabi et al. (in press)
	Erica glabella	100	0	208	0	18.23	73	1.03	0	0	0	51.943	Akinlabi et al. (in press)
	Erica grandiflora ssp. grandiflora	100	0	254	0	34.73	41	1.06	0	0	0	215.157	Akinlabi et al. (in press)
	Erica gysbertii	100	0	257	0	15.81	22	1.01	0	0	0	184.69	Akinlabi et al. (in press)
	Erica imbricata	100	0	222	0	14.77	23	0.9	0	0	0	142.56	Akinlabi et al. (in press)
	Erica inaequalis	100	0	236	0	21.99	20	1.06	0	0	0	259.482	Akinlabi et al. (in press)
	Erica maderi	100	0	241	0	20.17	115	1.02	0	0	0	42.2693	Akinlabi et al. (in press)
	Erica nudiflora	100	0	181	0	21.91	86	0.99	0	0	0	46.1129	Akinlabi et al. (in press)
	Erica parilis	100	0	258	0	28.34	55	1.02	0	0	0	132.94	Akinlabi et al. (in press)
	Erica perspicua	100	0	408	0	22.08	23	1.13	0	0	0	391.68	Akinlabi et al. (in press)
	Erica placentiflora	50	0	231	0	15.96	29	1.01	0	0	0	127.13	Akinlabi et al. (in press)
	Erica scabriuscula	100	0	219	0	36.13	35	1.02	0	0	0	226.071	Akinlabi et al. (in press)
	Erica sparsa	100	0	265	0	34.48	85	1.02	0	0	0	107.496	Akinlabi et al. (in press)
	Erica totta	100	0	184	0	17.42	93	1.02	0	0	0	34.4654	Akinlabi et al. (in press)
	Erika nubigena	100	0	214	0	28.81	40	1.03	0	0	0	154.134	Akinlabi et al. (in press)
	Erika plukenetii ssp. plukenetii	100	0	210	0	19.2	111.7	1.01	0	0	0	36.0967	Akinlabi et al. (in press)
Legend:
GR: presence of growth rings (0 - absent; 50 - indistinct; 100 - distinct)
Porosity: presence of ring-porous and semi-ring-porous woods (diffuse-porous - 0; semi-ring-porous - 50; ring-porous - 100)
Lv: average length of vessel element (µm)
Perf: presence of scalariform perforation plates ( only simple - 0; mostly simple, few scalariform - 50; mostly of exclusively scalarifrom - 100)
Dv: average tangential diameter of vessels (µm)
Ns: average number of vessels per sq. mm
Ngr: average number of vessels per group
HT: presence of helical thickenings (0 - absent; 100 - present)
FT: presence of fibre tracheids (0 - absent; 100 - present)
VT: presence of vasicentric and vascular tracheids (0 - absent; 100 - present)
M: mesomorphy index (Lv x Dv / Ns)
